# Supplementary material for: Association of Alkaline Phosphatase with Cardiovascular Disease in Patients with Dyslipidemia: A 6-Year Retrospective Study
Source: MDPI journal article supplement (doi:10.3390/jcdd11020060), 2024-02-15
Supplement: s1 [file s1]

## Supplementary Material

**Table S1** Baseline laboratory variables across tertiles of alkaline phosphatase.

|                                                                  | Tertiles of alkaline phosphatase |                  |                     |                     | p     |
|------------------------------------------------------------------|----------------------------------|------------------|---------------------|---------------------|-------|
|                                                                  | Total Sample                     | Lower            | Middle              | Highest             |       |
| Estimated glomerular filtration rate, mL/min/1.73 m <sup>2</sup> | 80.7 (70.57-91.79)               | 83 (72.24-92.35) | 80.79 (71.98-90.51) | 78.63 (68.53-92.21) | NS    |
| Aspartate aminotransferase, IU/L                                 | 21 (18-25)                       | 21 (18.25)       | 22 (18-26)          | 21 (18-25)          | NS    |
| Alanine aminotransferase, IU/L                                   | 22 (17-29)                       | 21 (16-28)       | 22 (17-29)          | 22 (17-29)          | NS    |
| Gamma-glutamyltranspetidase, IU/L                                | 18 (13-28)                       | 18 (12-25.5)     | 18 (13-28)          | 20 (14-30)          | NS    |
| Total bilirubin, mg/dL                                           | 0.6 (0.5-0.8)                    | 0.7 (0.5-0.8)    | 0.6 (0.5-0.8)       | 0.6 (0.5-0.8)       | NS    |
| Direct bilirubin mg/dL                                           | 0.1 (0.08-0.13)                  | 0.11 (0.09-0.14) | 0.1 (0.08-0.13)     | 0.09 (0.07-0.12)    | <0.05 |
| Hemoglobin, g/dL                                                 | 14 (13.2-14.9)                   | 14.1 (13.2-15.1) | 13.9 (13.1-14.9)    | 13.9 (13.1-14.6)    | NS    |
| Calcium, md/dL                                                   | 9.7 (9.4-10)                     | 9.7 (9.4-10)     | 9.76 (9.4-10)       | 9.6 (9.4-9.9)       | <0.05 |
| Phosphate, mg/dL                                                 | 3.3 (3-3.7)                      | 3.2 (2.9-3.6)    | 3.3 (3-3.8)         | 3.4 (2.95-3.7)      | NS    |
| Albumin, g/dL                                                    | -                                | 4.4 (4.3-4.6)    | 4.4 (4.2-4.6)       | 4.5 (4.3-4.7)       | NS    |

Tertiles of alkaline phosphatase were defined as the following: lowest: <67 U/L, middle: 67-79 U/L, highest: ≥79 U/L

**Table S2** Participants' alkaline phosphatase levels and metabolic profile stratified by lipid-lowering therapy.

|                                             | No lipid-lowering therapy | Lipid-lowering therapy | p     |
|---------------------------------------------|---------------------------|------------------------|-------|
| Alkaline Phosphatase, IU/L                  | 69 (55-92)                | 64 (53-82)             | <0.05 |
| Systolic blood pressure, mmHg               | 140 (126-150)             | 134 (123-150)          | <0.05 |
| Diastolic blood pressure, mmHg              | 86 (80-95)                | 80 (75-90)             | <0.05 |
| Fasting plasma glucose, mg/dL               | 95 (87-105)               | 99 (90-112)            | <0.05 |
| Total cholesterol, mg/dL                    | 257 (228-291)             | 205 (179-246)          | <0.05 |
| Triglycerides, mg/dL                        | 131 (94-188)              | 127 (90-179)           | NS    |
| High-density lipoprotein cholesterol, mg/dL | 52 (45-64)                | 51 (43-60)             | <0.05 |
| Low-density lipoprotein cholesterol, mg/dL  | 173 (146-201)             | 124 (100-164)          | <0.05 |
